# Supplementary material for: Chiral, radical, gold bis(dithiolene) complexes
Source: Royal Society of Chemistry journal article supplement (doi:10.1039/c6nj01177b), 2016-01-01
Supplement: c6nj01177b1.pdf [file c6nj01177b1.pdf]

## Chiral, radical, gold bis(dithiolene) complexes

Ronan Le Pennec, Olivier Jeannin, Pascale Auban-Senzier, and Marc Fourmigué

### Electronic Supplementary Information (ESI)

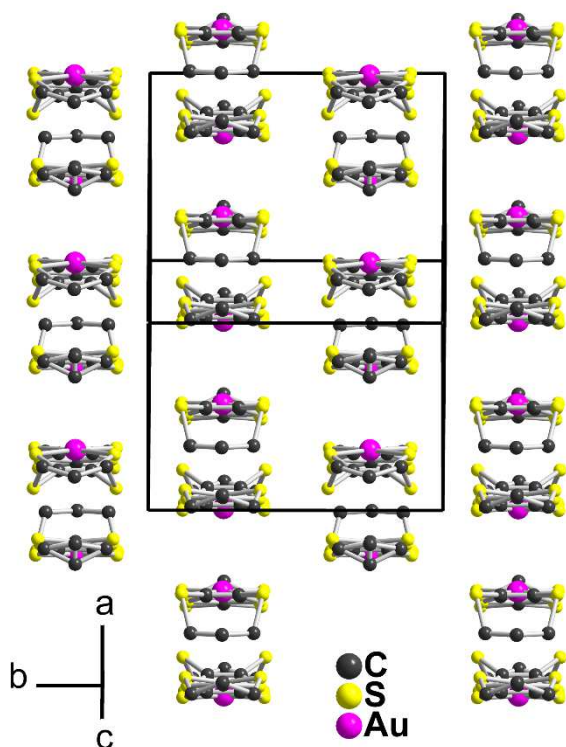

**Fig. S1** View of the slabs formed out of alternating dyads stacking along *a* in **1''**.

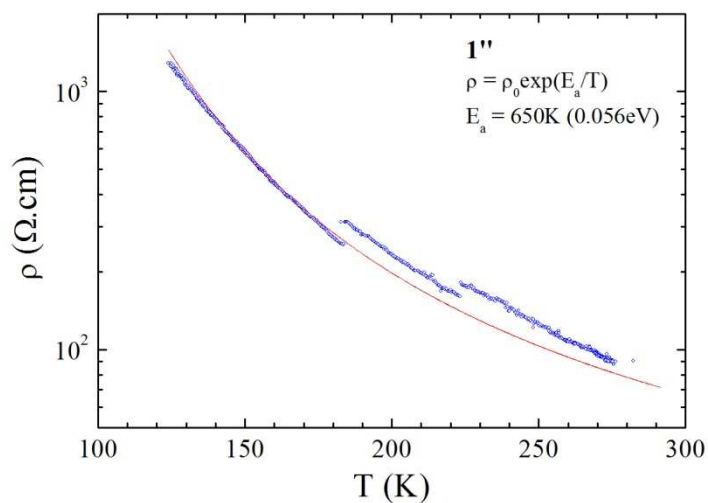

**Fig. S2** Temperature dependence of the resistivity of the radical complex **1''**. The red line is the Arrhenius fit to the data giving the activation energy  $E_a = 0.056\text{eV}$ .

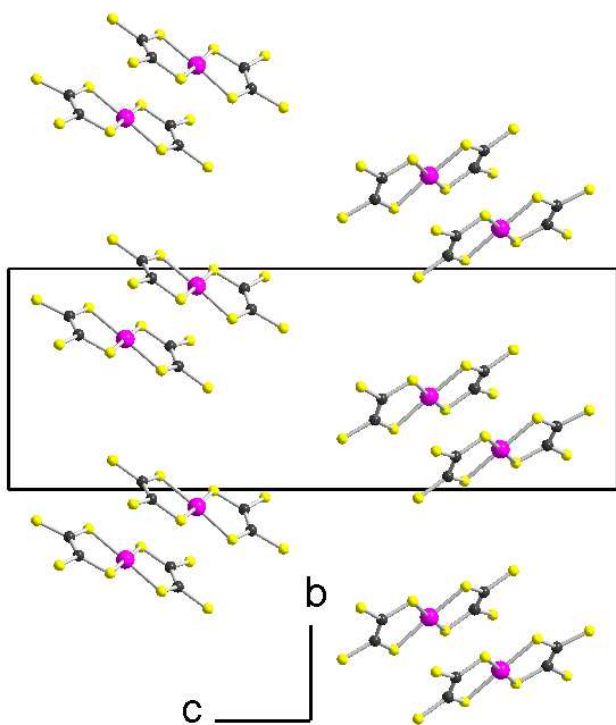

**Fig. S3** Projection view along *a* of the unit cell of the radical complex **3'**. The outer chiral substituents have been removed for clarity to highlight the isolated character of the dyads in the solid state.

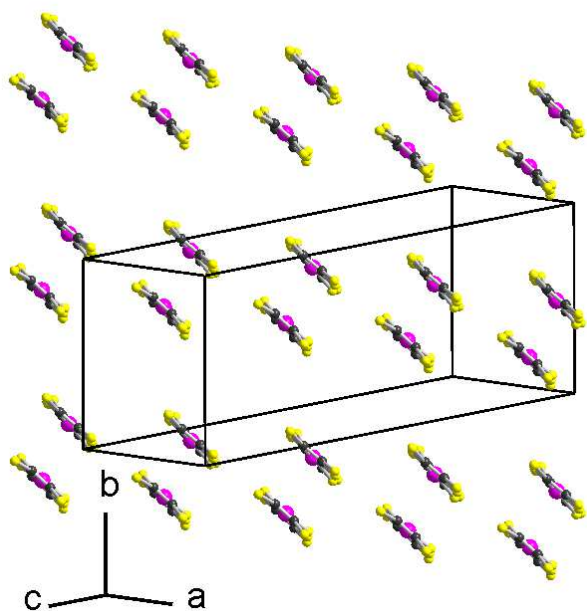

**Fig. S4** Detail of one (*a,c*) layer in **3'**, viewed along the long molecular axis of the complex.
